# Supplementary material for: Pathways of ocean heat towards Pine Island and Thwaites grounding lines
Source: Springer Nature journal article supplement (doi:10.1038/s41598-019-53190-6), 2019-11-22
Supplement: MOESM1 [file 41598_2019_53190_MOESM1_ESM.pdf]

1 Supplementary Information

2

3 Pathways of ocean heat towards Pine Island and Thwaites grounding lines.

4

5 Yoshihiro Nakayama<sup>1,2\*</sup>, Georgy Manucharyan<sup>3</sup>, Hong Zhang<sup>1</sup>, Pierre Dutrieux<sup>4</sup>, Hector S.

6 Torres<sup>1</sup>, Patrice Klein<sup>1,5</sup>, Helene Seroussi<sup>1</sup>, Michael Schodlok<sup>1</sup>, Eric Rignot<sup>1,6</sup>, Dimitris

7 Menemenlis<sup>1</sup>

8

9 **Affiliations:**

10 <sup>1</sup> Jet Propulsion Laboratory, California Institute of Technology, 4800 Oak Grove Drive,

11 Pasadena, CA, USA

12 <sup>2</sup> Institute of Low Temperature Science, Hokkaido University, Sapporo, Japan

13 <sup>3</sup> California Institute of Technology, Pasadena, CA, USA

14 <sup>4</sup> Lamont-Doherty Earth Observatory, Columbia University, NY, USA

15 <sup>5</sup> Laboratoire de Physique des Océans, IFREMER - CNRS - IRD - UBO, Plouzané, France

16 <sup>6</sup> Earth System Science, University of California Irvine, CA, USA

17

18 \*Correspondence to: Yoshihiro Nakayama (Yoshihiro.Nakayama@lowtem.hokudai.ac.jp)

19

## 20 **Comparison with CTD observations**

21 Conductivity-Temperature-Depth (CTD) observations were obtained in 2010 in the Pine  
22 Island Bay region<sup>33</sup>. The simulated and observed vertical profiles of potential temperature and  
23 salinity for sections A-C capture large-scale hydrographic structures, showing WW with  
24 temperature minimum at 100-300 m and warm CDW below (Supplementary Figures 4-10). For  
25 section A, CDW properties at the depth of 500 m are warmer and fresher by  $\sim 0.3^{\circ}\text{C}$  and 0.04,  
26 respectively (Supplementary Figures 4 and 5 b-c, e-f). For section B, simulated CDW properties  
27 are warmer than observations, which is likely caused by too warm CDW properties at the  
28 northern model boundary (Figure 2 and Supplementary Figure 6-7). A previous study<sup>51</sup> noted the  
29 existence of a gyre in the Pine Island Bay based on hydrographic data collected in 2009.  
30 However, we do not detect significant gyre circulation in our simulation (Supplementary Figure  
31 10). For section C, simulated CDW properties are warmer than the observations, which is likely  
32 caused by too warm CDW properties at the northern model boundary (Supplementary Figure 8-  
33 9). The simulated thermocline depth along section C is shallower than the observations by 100-  
34 200 m.

## 35 **Comparison with mooring observations**

36 Observed time series of potential temperature do not show large fluctuations and water  
37 mass properties become more stable in the deeper part of the water column (Supplementary  
38 Figure 10). Such features are well reproduced in the CTRL case. We note that the simulated time  
39 series of potential temperature show warm bias for all depths, which is likely caused by (1)  
40 simulated CDW properties  $\sim 0.3^{\circ}\text{C}$  warmer than observations (discussed above) and (2)  
41 simulated thermocline depth  $\sim 100$  m shallower than observations (Figures 2b-c).

42

43 **Particle experiments**

44 To test the importance of mean ocean current, we perform another particle release  
45 experiment using 60-day mean ocean currents. Paths and timescales of CDW transport into the  
46 PIIS cavity do not change appreciably (Supplementary Figure 15), confirming the importance of  
47 the ocean mean current (Supplementary Figure 15). We note, however, that no particles are  
48 found in the TIS cavity for the particle release experiment that uses the 60-day mean ocean  
49 currents. This is because the particles that are supposed to travel southwards to the TIS flow  
50 northwards instead (see red and blue arrows in Supplementary Figure 16) for this particle release  
51 experiment. This does not mean that the mean current plays an unimportant role in determining  
52 CDW pathways into the TIS. Instead, this emphasizes the importance of ocean eddies and short-  
53 time variability to help bridge the gap between mean ocean current systems. Indeed, particle  
54 pathways into the TIS (red dots in Figure 4b) follow ocean mean current on the  $27.75 \text{ kg m}^{-3}$   
55 isopycnal (Figure 4d) reasonably well.

56

57 **PIIS melt variability at ApRES location**

58 A year-long measurement of the PIIS basal melt rate near the ice shelf front (green dot in  
59 Figure 1e) was conducted in 2014 using Autonomous phase-sensitive Radio-Echo Sounder  
60 (ApRES)<sup>35</sup>. Here, we compare their summer measurements (between January 14 and March 14,  
61 2014) with simulated time series at the nearest model grid (Supplementary Figure 12). Since the  
62 hydrographic conditions in 2014 are colder than those in 2010 due to the deeper thermocline<sup>35</sup>,  
63 the observed basal melt rates are lower than the simulated rates (Supplementary Figure 12a).

64 However, the observed and both the CTRL and TIDE simulated time series appear to have  
65 fluctuation with frequencies of 7–10 days (see arrows in Supplementary Figure 12b).

66 A previous study hypothesized that this low-frequency variability is caused by vertical  
67 displacement of the thermocline, forced by atmospheric forcing. In our model simulation,  
68 however, low-frequency variability is only present in ocean speed but not in potential  
69 temperature (Supplementary Figure 20). This indicates that bottom ocean currents play a  
70 dominant role in controlling short-timescale ice shelf melt variability. Such short-term ocean  
71 variability originates from the open ocean. Horizontal distributions of ocean speed anomaly 50 m  
72 below the ocean top cell (or ice shelf base) for days 14–17 (Supplementary Figure 21) show that  
73 the eddy with anticlockwise circulation approaches closer to the ice shelf front (days 14 and 15)  
74 and higher ocean speed signal propagates inward from open ocean area into the PIIS cavity (days  
75 16 and 17), for example.

76

77

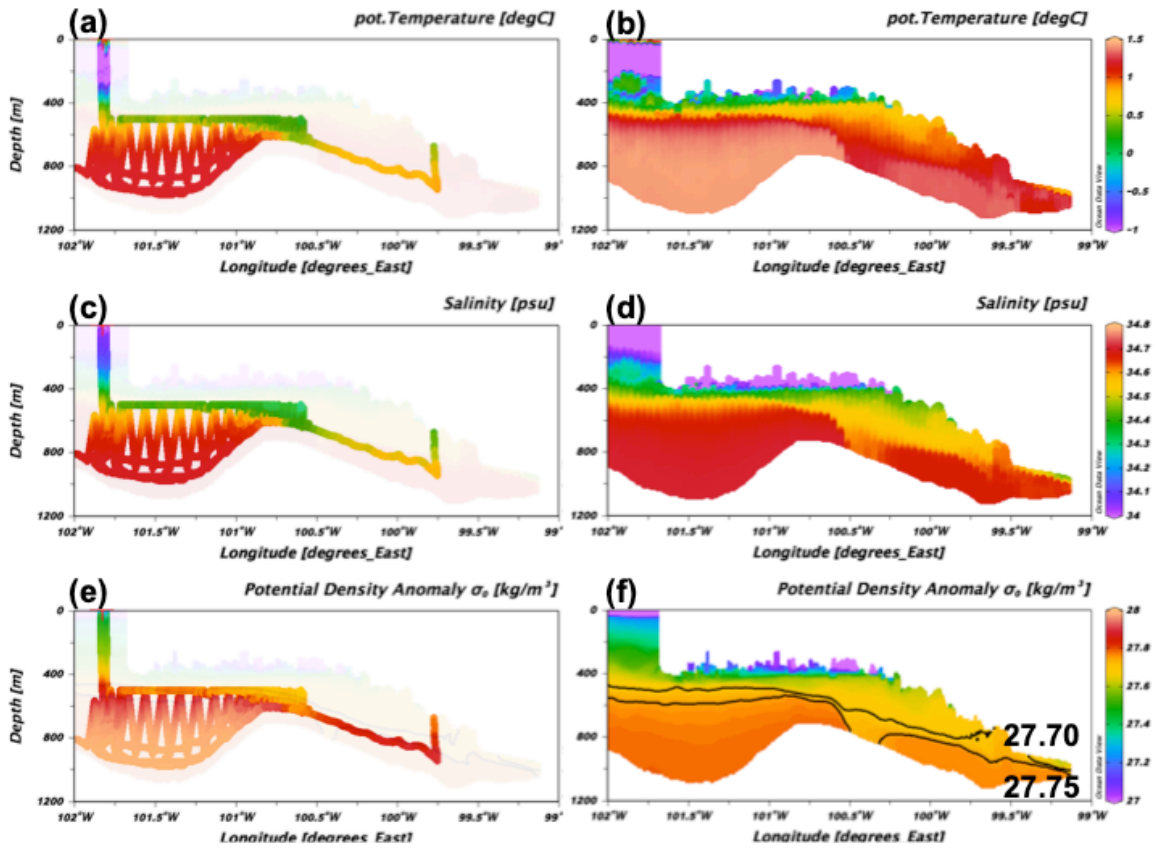

78

79

80 **Supplementary Figure 1.** Observed vertical sections of (a) potential temperature, (c) salinity,  
81 and (e) potential density in the Pine Island ice shelf (PIIS) cavity for January 2009. Underwater  
82 vehicle measurements are conducted along the orange line in Figure 1. Simulated vertical  
83 sections of (b) potential temperature, (d) salinity, and (f) potential density in the PIIS cavity for  
84 day 30 along the black line in Figure 1.

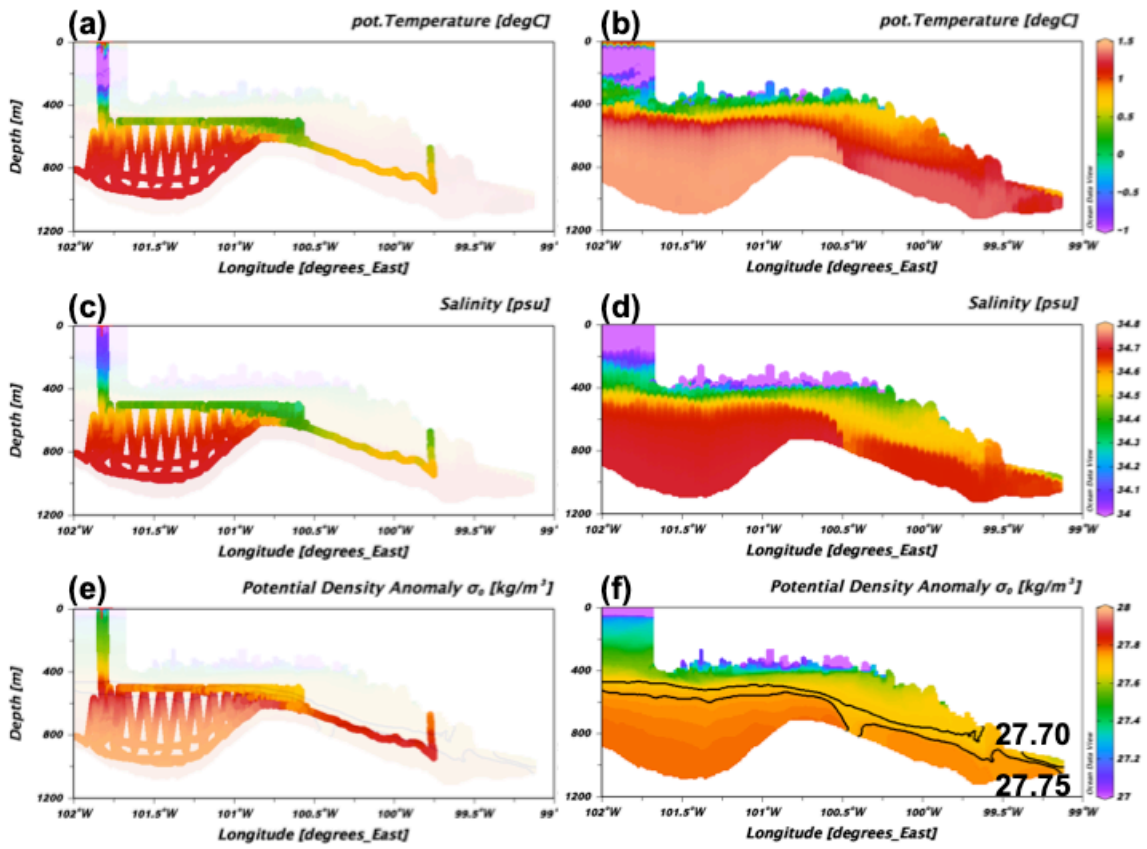

85

86 **Supplementary Figure 2.** Same as Supplementary Figure 1 but for simulated vertical sections

87 for day 60.

88

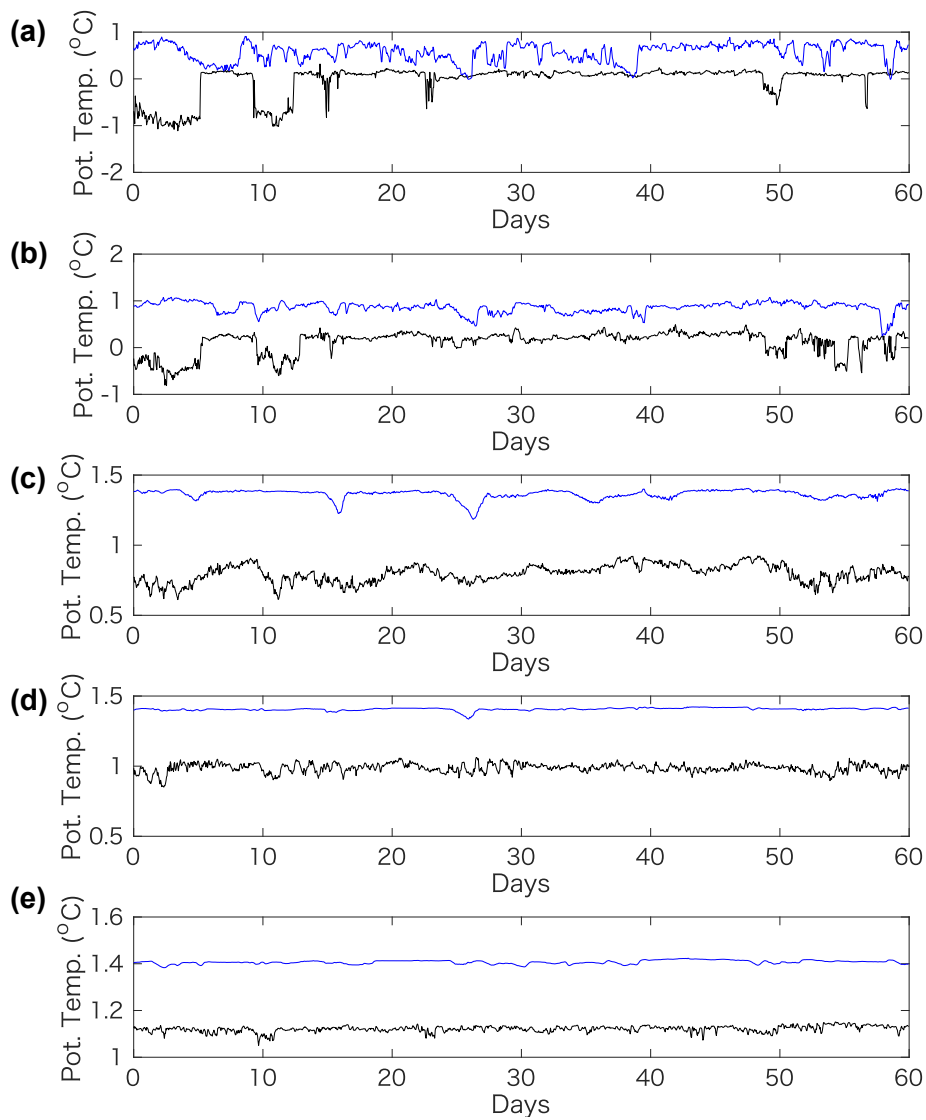

89

90 **Supplementary Figure 3.** The time series of potential temperature from the BSR5 mooring data  
 91 (black) at the mean depths of (a) 783 m, (b) 698m, (c) 611 m, (d) 482 m, and (e) 429 m. The time  
 92 series of simulated potential temperature at the depths of (a) 780 m, (b) 700 m, (c) 610 m, (d)  
 93 480 m, and (e) 430 m for the CTRL case (blue). Since no salinity data is obtained in the mooring  
 94 measurements, salinity of 34.75 is assumed to convert from in-situ to potential temperature.  
 95 These observations are obtained at the same time as the model simulation.

96

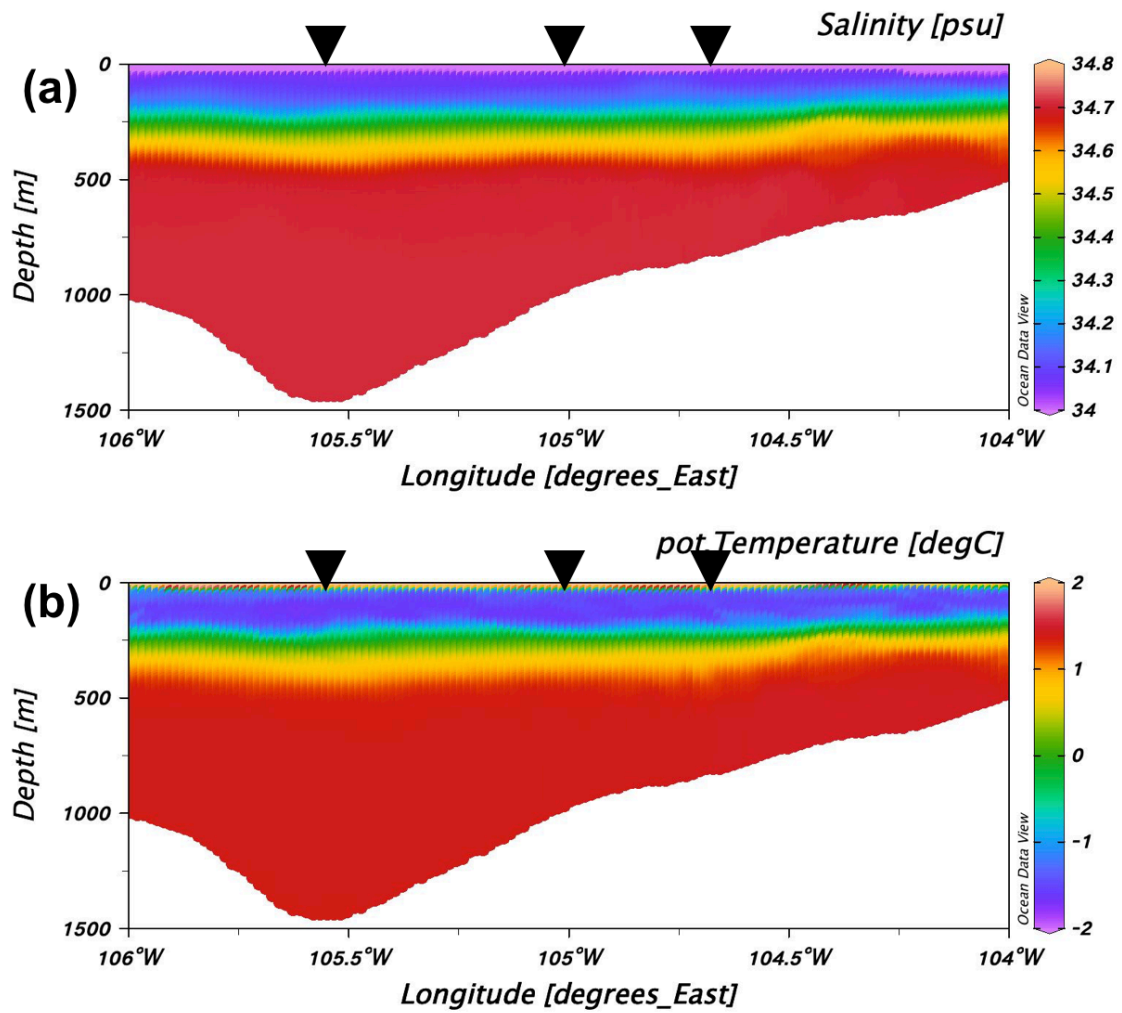

97

98 **Supplementary Figure 4.** Simulated vertical sections of (a) salinity and (b) potential  
99 temperature on January 30, 2010 along section A in Figure 1. Black triangles indicate the  
100 locations of CTD observations.

101



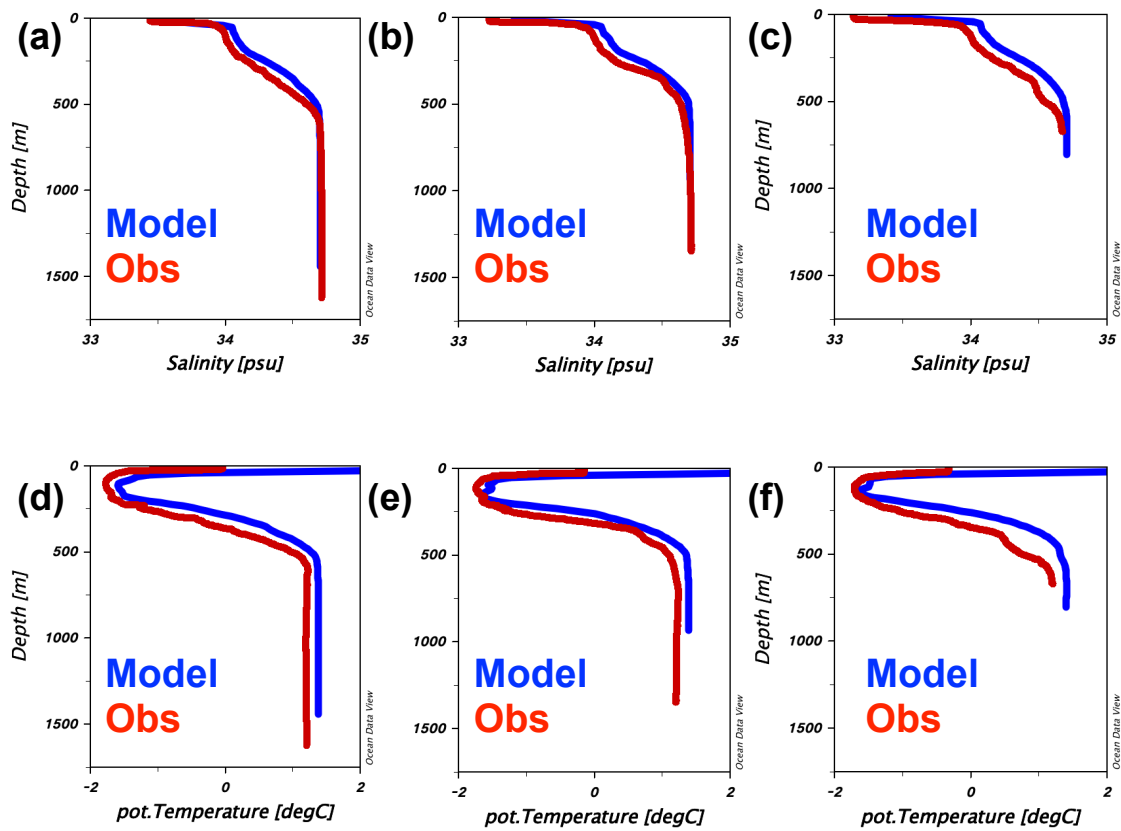

102

103 **Supplementary Figure 5.** Observed and simulated vertical profiles of salinity and potential  
 104 temperature at the locations indicated by the black triangles along section A in Supplementary  
 105 Figure 4 (ordered from left to right).

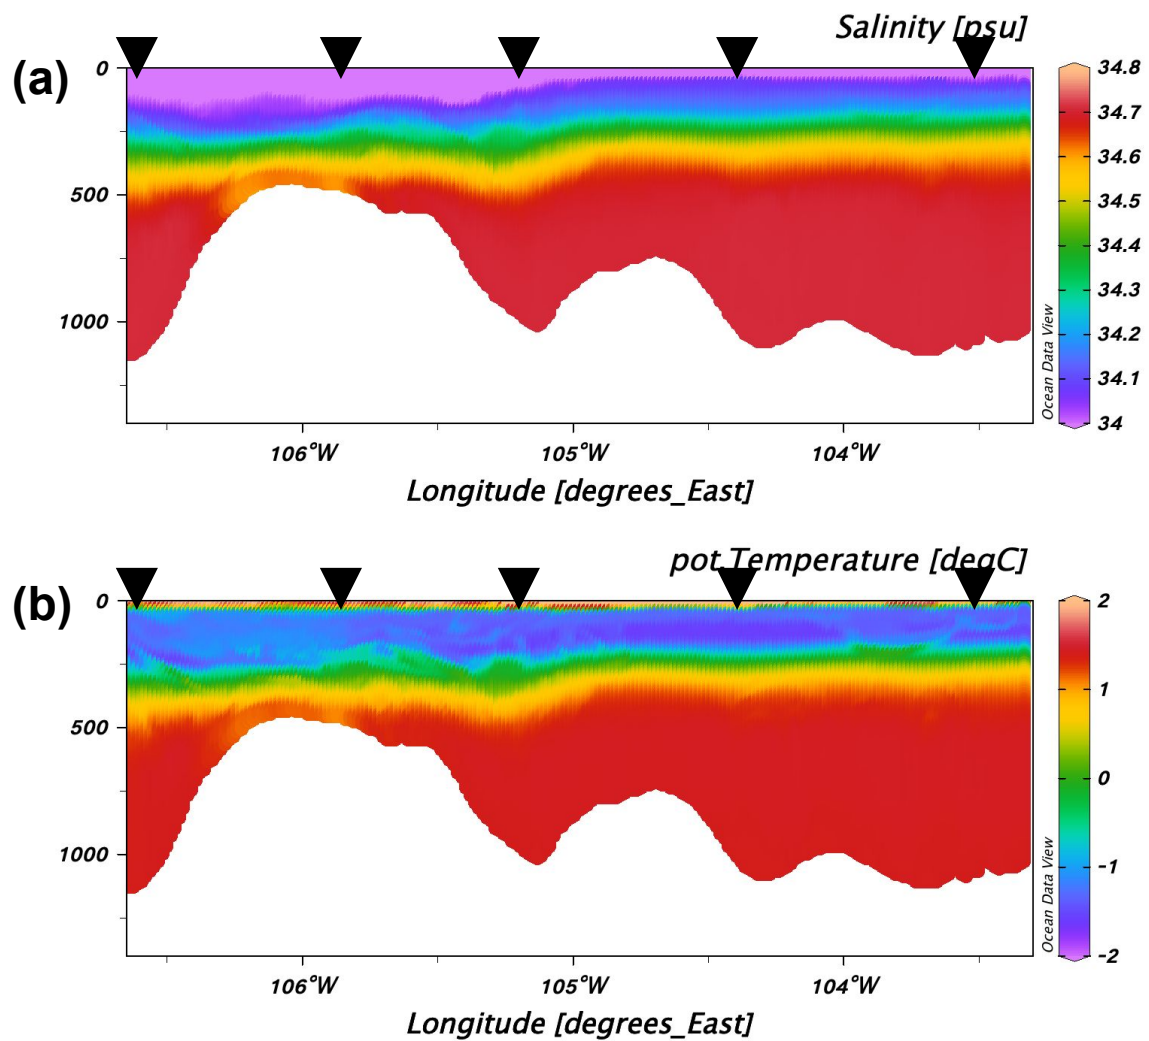

106

107 **Supplementary Figure 6.** Simulated vertical sections of (a) salinity and (b) potential  
 108 temperature on January 30, 2010 along section B in Figure 1. Black triangles indicate the  
 109 locations of CTD observations.

110

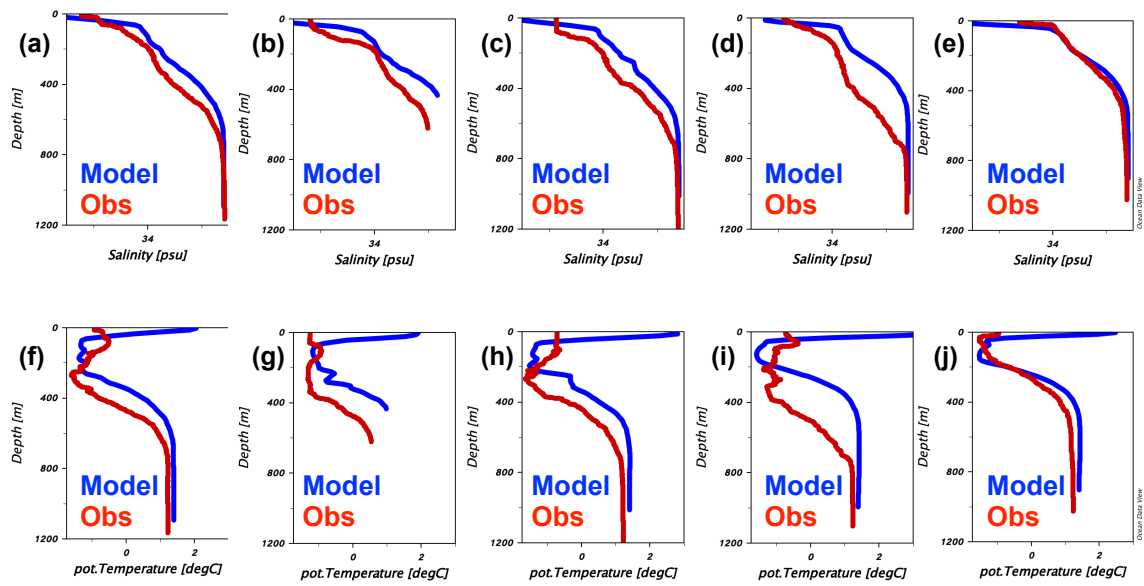

111

112 **Supplementary Figure 7.** Observed and simulated vertical profiles of potential temperature and  
 113 salinity at the locations indicated by the black triangles along section B in Supplementary Figure  
 114 6 (ordered from left to right).

115

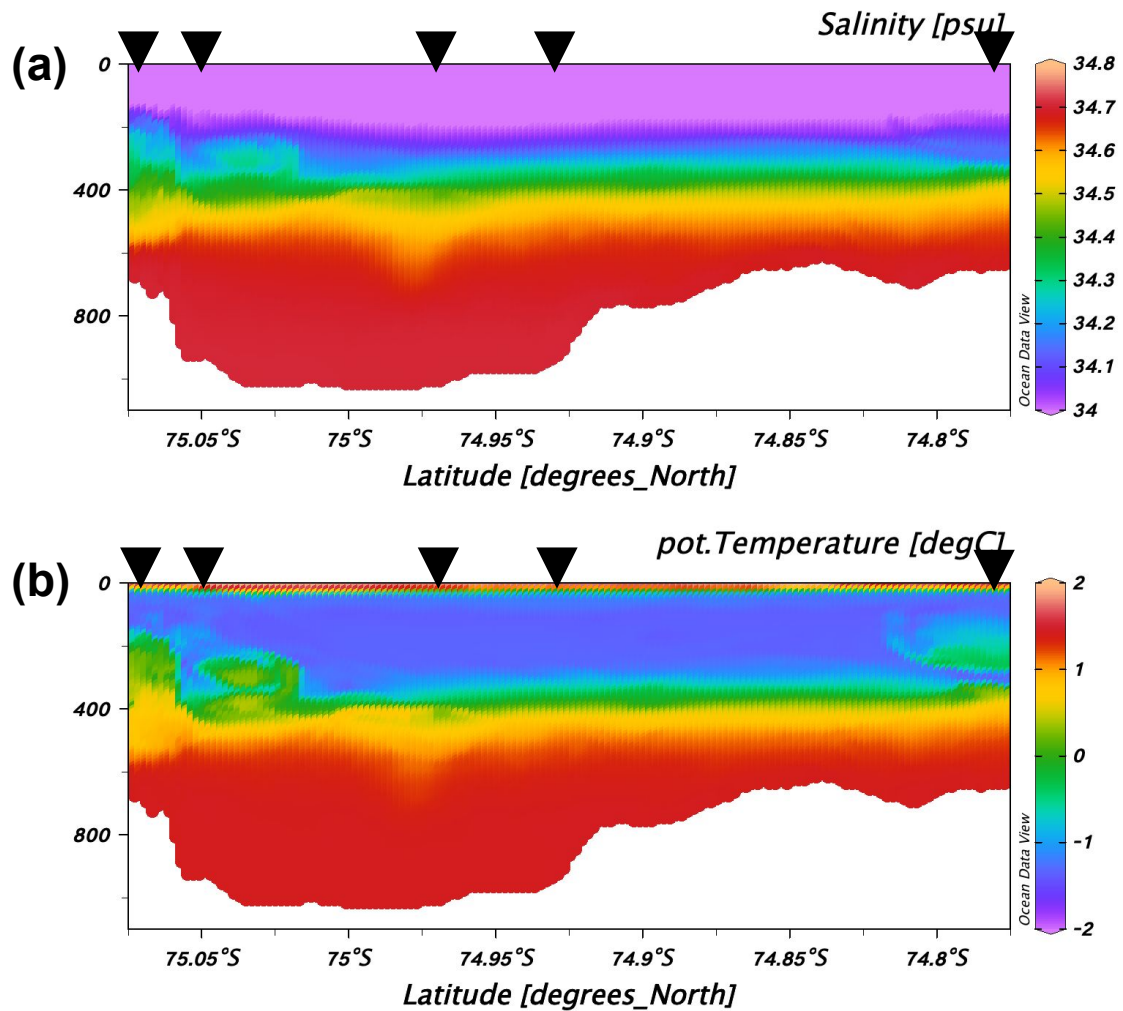

117

118 **Supplementary Figure 8.** Simulated vertical sections of (a) salinity and (b) potential  
 119 temperature on January 30, 2010 along section C in Figure 1. Black triangles indicate the  
 120 locations of CTD observations.

121

122

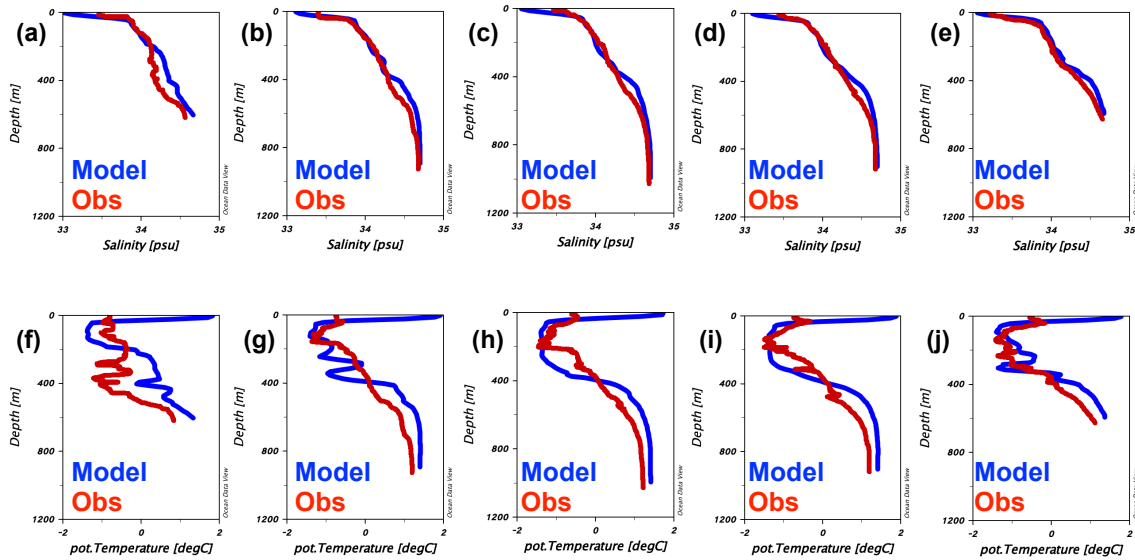

123

124 **Supplementary Figure 9.** Observed and simulated vertical profiles of potential temperature and  
125 salinity at the locations indicated by the black triangles along section C in Supplementary Figure  
126 8 (ordered from left to right).

127

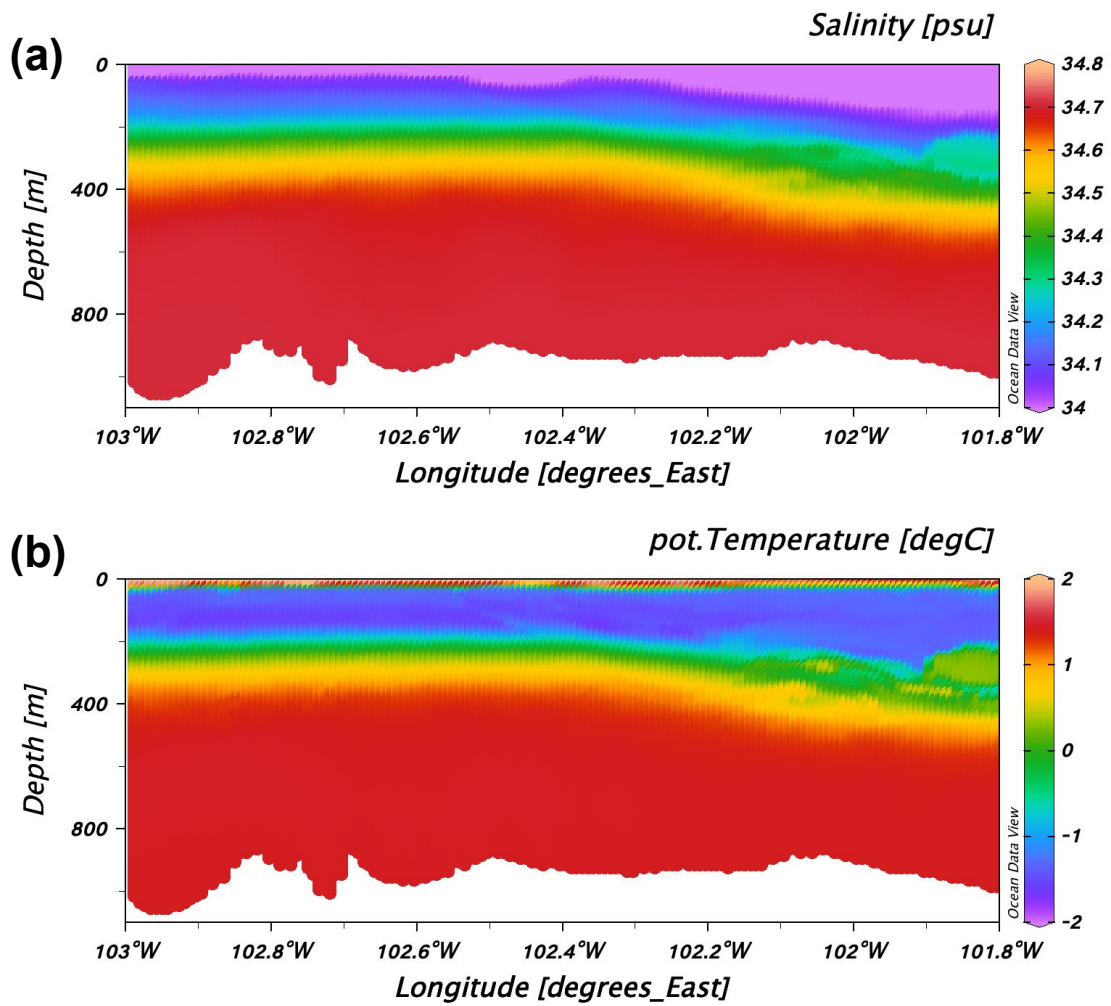

128

129 **Supplementary Figure 10.** Simulated vertical sections of (a) salinity and (b) potential  
130 temperature on January 30, 2010 along section D in Figure 1.

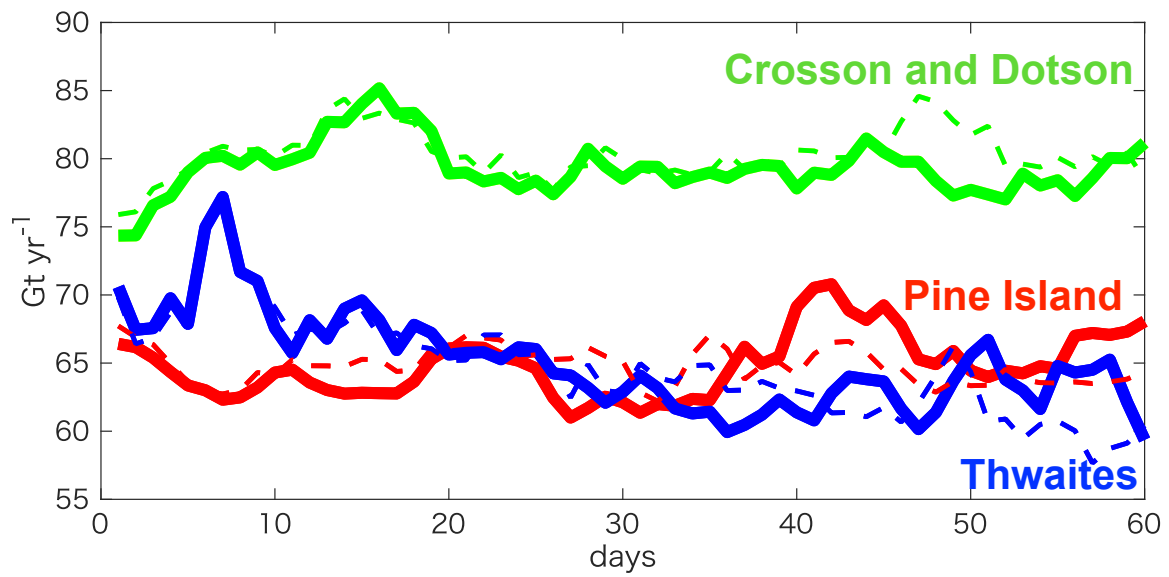

131

132 **Supplementary Figure 11.** Simulated time series of basal melt rates from January 1 2010 to  
 133 March 1 2010 for the Pine Island, Thwaites, and Crosson and Dotson ice shelves for the CTRL  
 134 (solid) and TIDE (dashed) experiments.

135

136

137

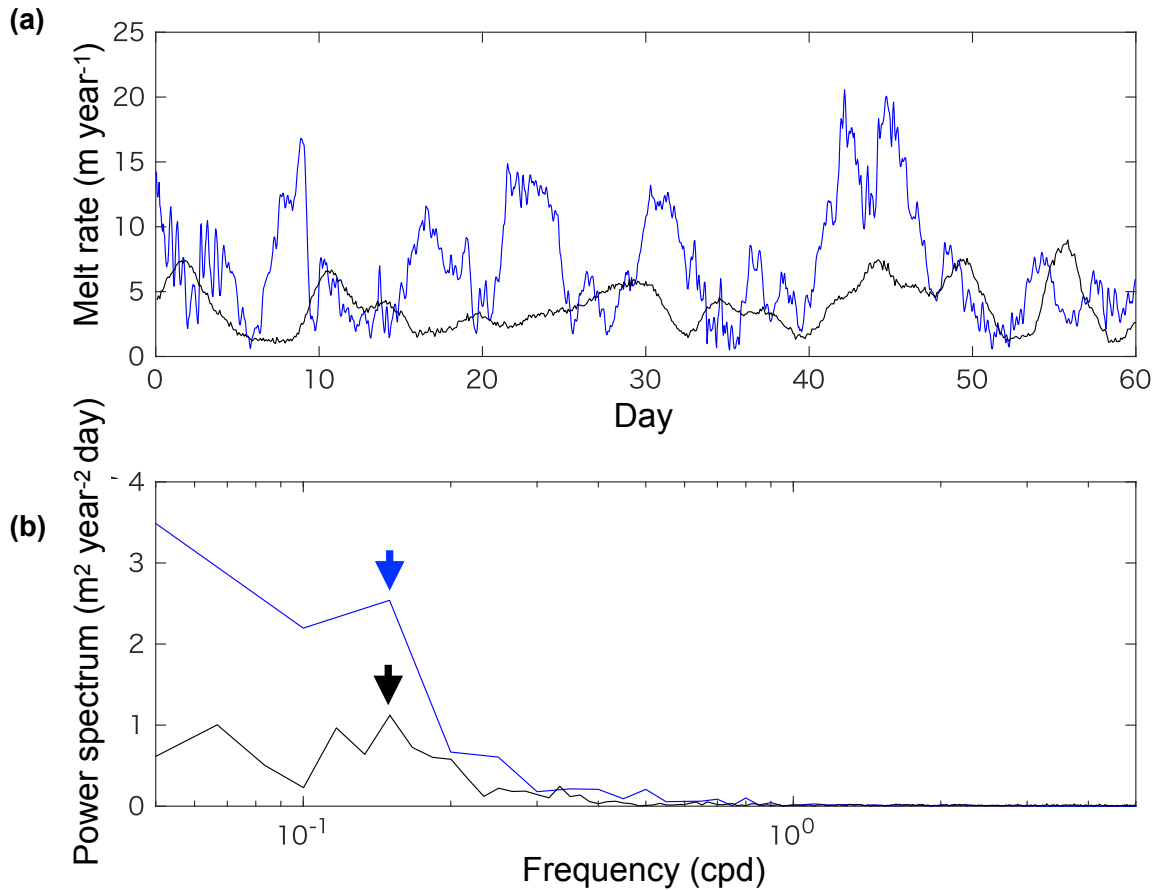

138

139 **Supplementary Figure 12.** Time series of observed PIIS melt rate at the location of ApRES  
140 measurement (74.97 °S, 100.99 °W) (black) and simulated PIIS melt rate at the nearest grid point  
141 (101.00°W, 74.97°S) for the CTRL case (blue). (b) Power spectrums of observed (black) and  
142 simulated (CTRL (blue)) melt rates. Arrows are placed to show the peaks of the spectrums. In-  
143 situ ice shelf draft at the location of ApRES observation was approximately 422 m while the  
144 prescribed ice shelf draft for our simulation is 492 m. These observations are obtained in 2014  
145 when the thermocline depth was ~200 m deeper<sup>12</sup>. Thus, observed ice shelf melt and ocean speed  
146 are expected to be lower and less variable.



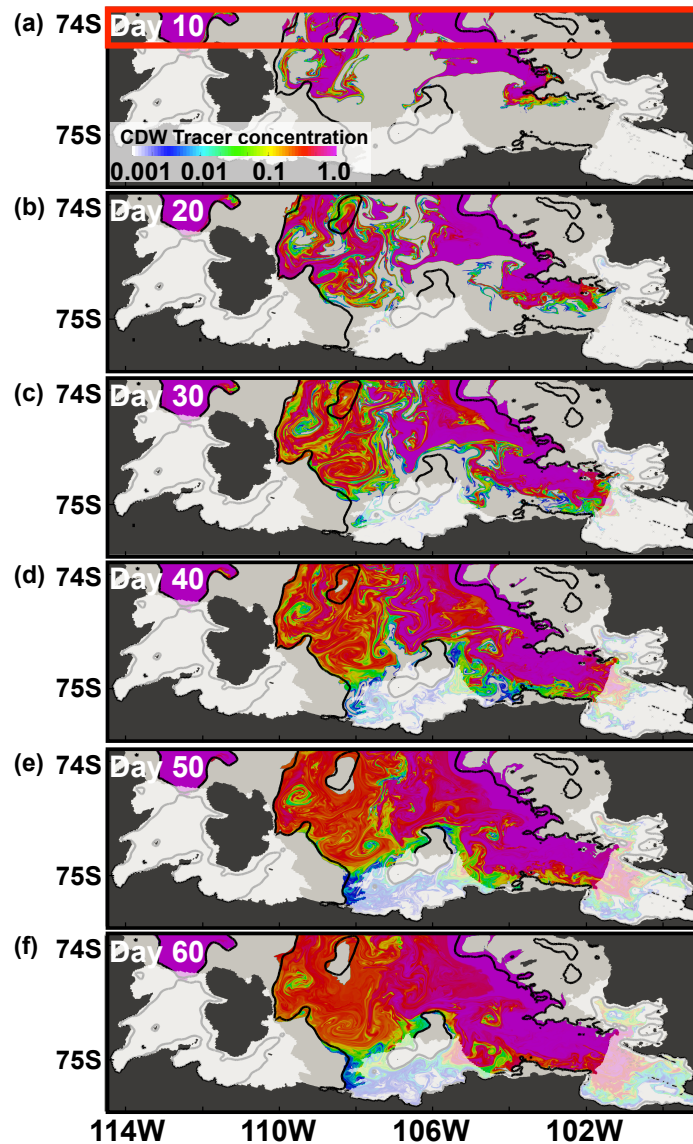

147

148 **Supplementary Figure 13.** (a) Spatial distributions of tracers representing CDW after (a) 10, (b)  
 149 20, (c) 30, (d) 40, (e) 50, and (f) 60 days of model simulation. The concentration of CDW tracer  
 150 is set to 1.0 in the region north of 74.24° S (shown by the red box in (a)) and potential  
 151 temperature higher than 1 °C. For all panels, bathymetric contours of 500 m are shown (black)  
 152 and ice shelves are shown with partially-transparent white patches, similar to Figure 1.

153

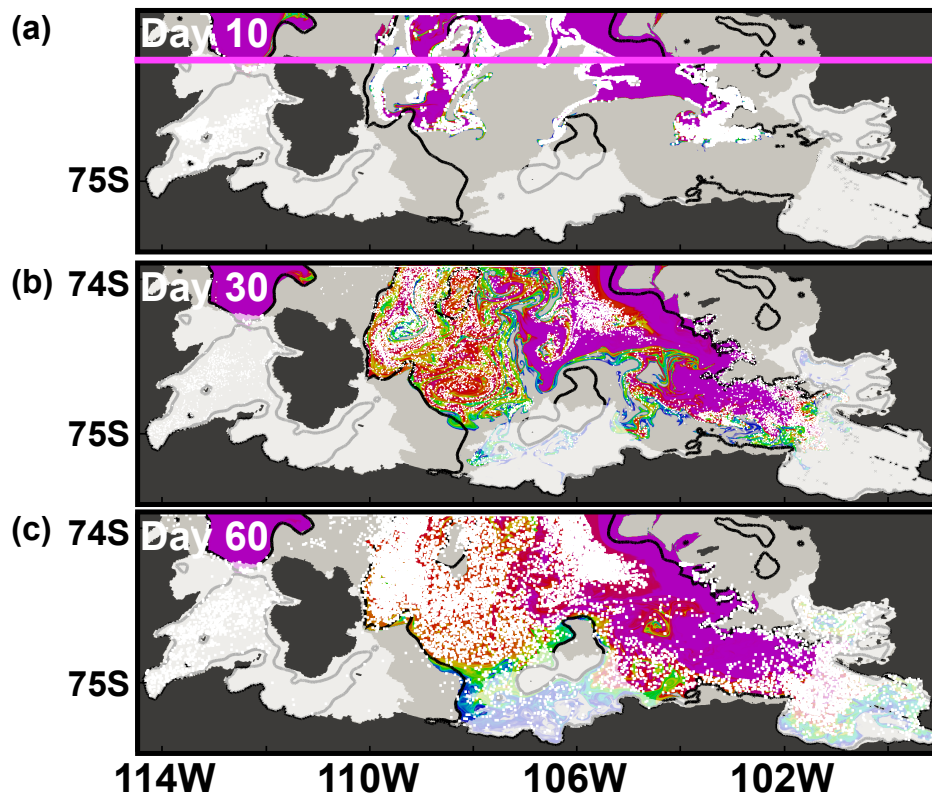

154

155 **Supplementary Figure 14.** Spatial distributions of particles (white points) initially released

156 along 74.24° S (pink) after (a) 10, (b) 30, and (c) 60 days of model simulation. Horizontal

157 distributions of CDW tracer (same as Fig. S6) are also shown to indicate that particles and CDW

158 tracer behave similarly. For all panels, bathymetric contours of 500 m are shown (black) and ice

159 shelves are shown with partially-transparent white patches, similar to Figure 1.

160

161

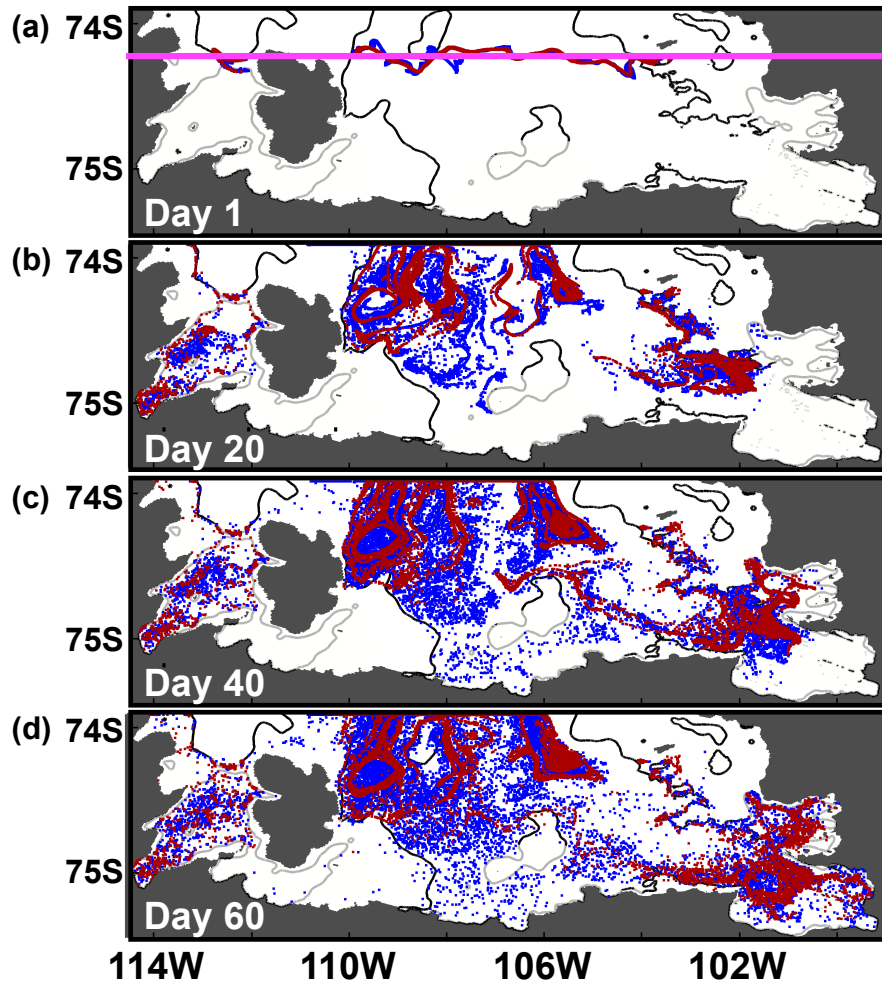

162

163

164 **Supplementary Figure 15.** Spatial distributions of particles initially released along 74.24° S  
 165 (pink) after (a) 1, (b) 20, (c) 40, and (d) 60 days of model simulation. Red particles change their  
 166 location based on hourly velocity fields, while blue particles change their location based on the  
 167 60-day mean model velocity field. For all panels, bathymetric contours of 500 m are shown  
 168 (black).

169

170

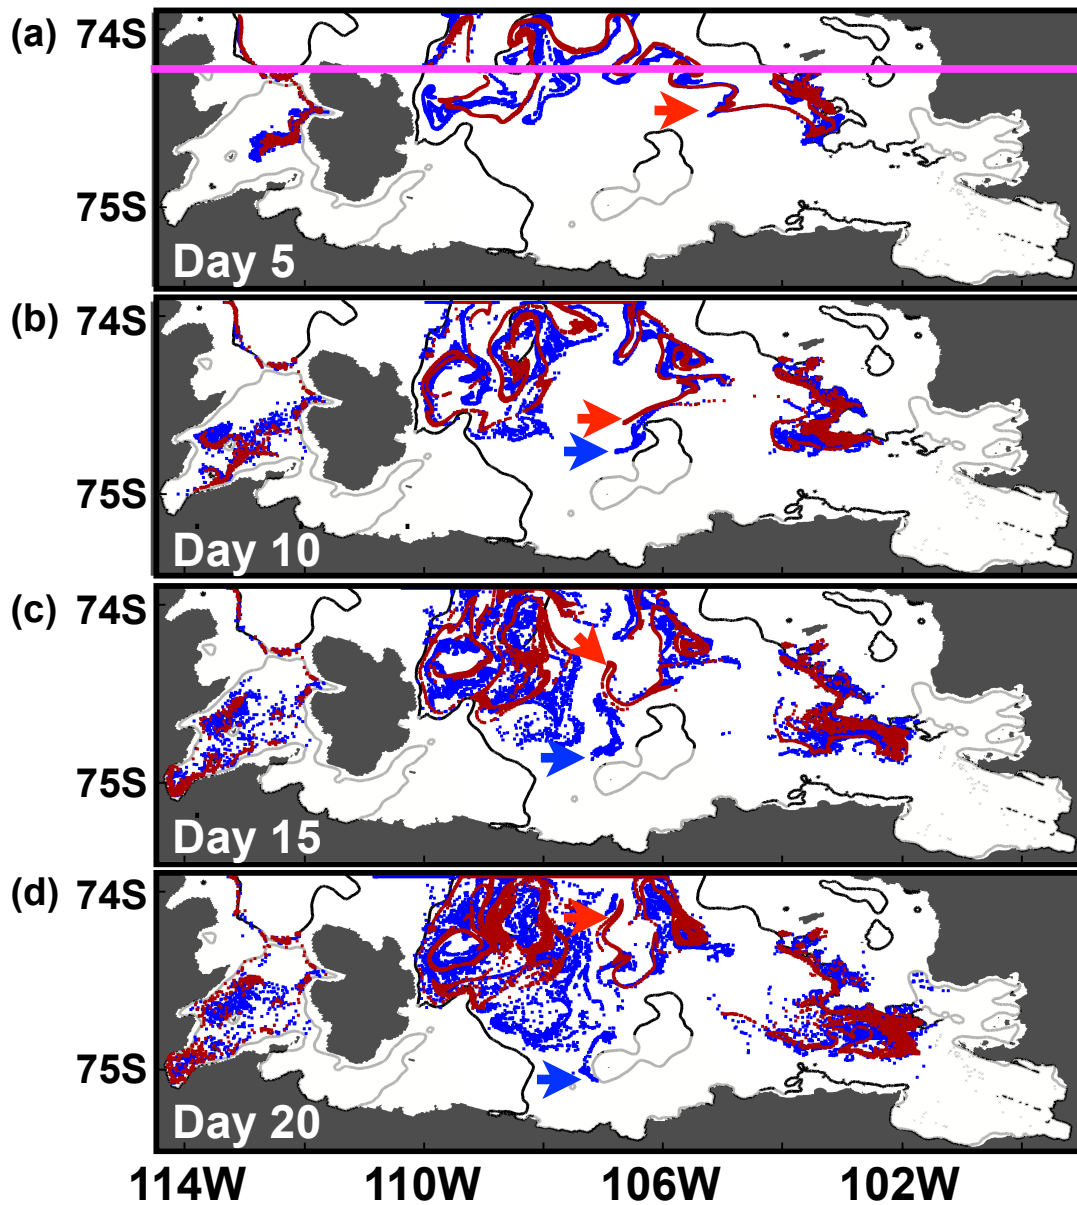

171

172

173 **Supplementary Figure 16.** Same as Fig. S8 but after (a) 5, (b) 10, (c) 15, and (d) 20 days of  
 174 model simulation. Red and blue arrows are inserted to emphasize the difference of pathways for  
 175 red and blue particles. After day 20, blue particles (indicated by blue arrow) travel towards the  
 176 Thwaites ice shelf (TIS) grounding line.

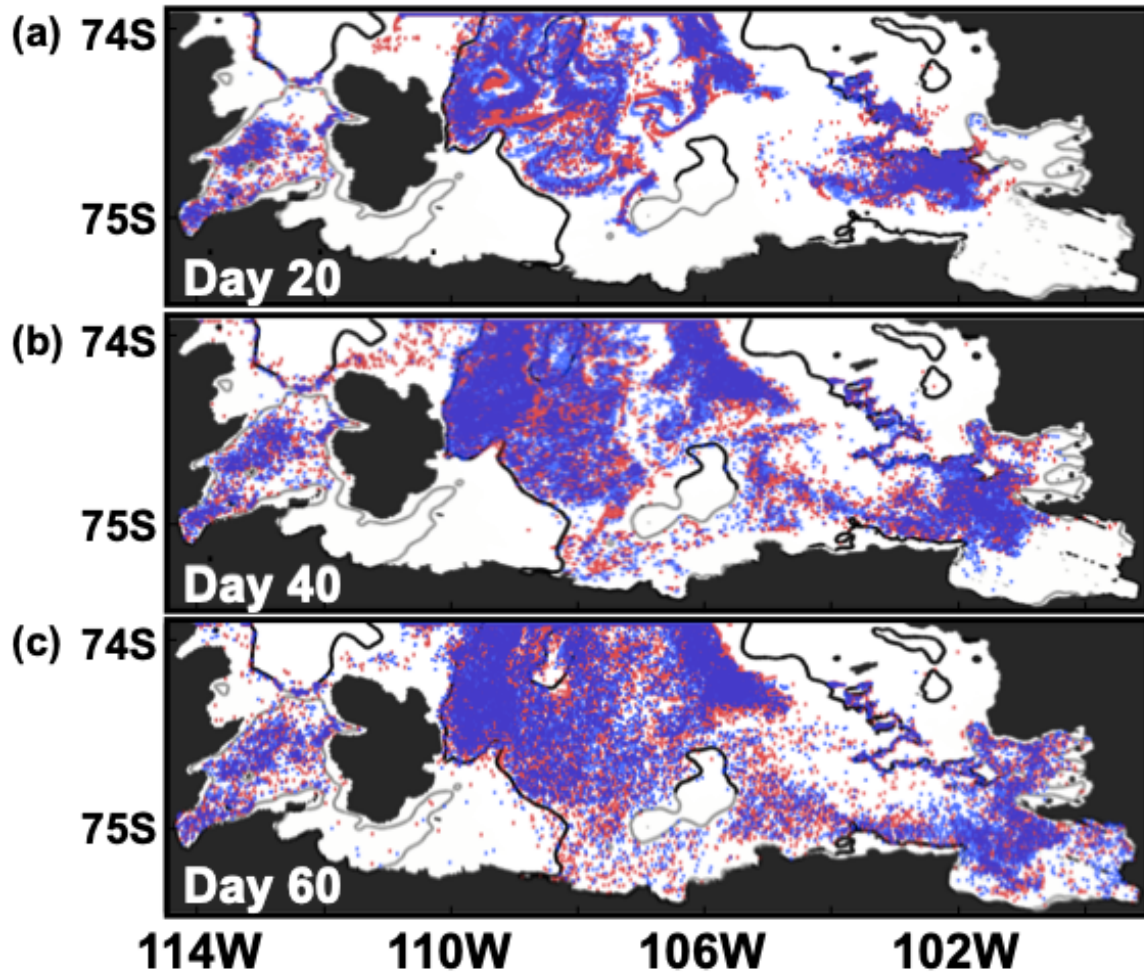

178

179 **Supplementary Figure 17.** Spatial distributions of particles initially released along 74.24° S  
180 (pink) after (a) 20 (b) 40, and (c) 60 days of model simulation for CTRL (blue) and TIDE (red).

181 For all panels, bathymetric contours of 500 m are shown (black).

182

183

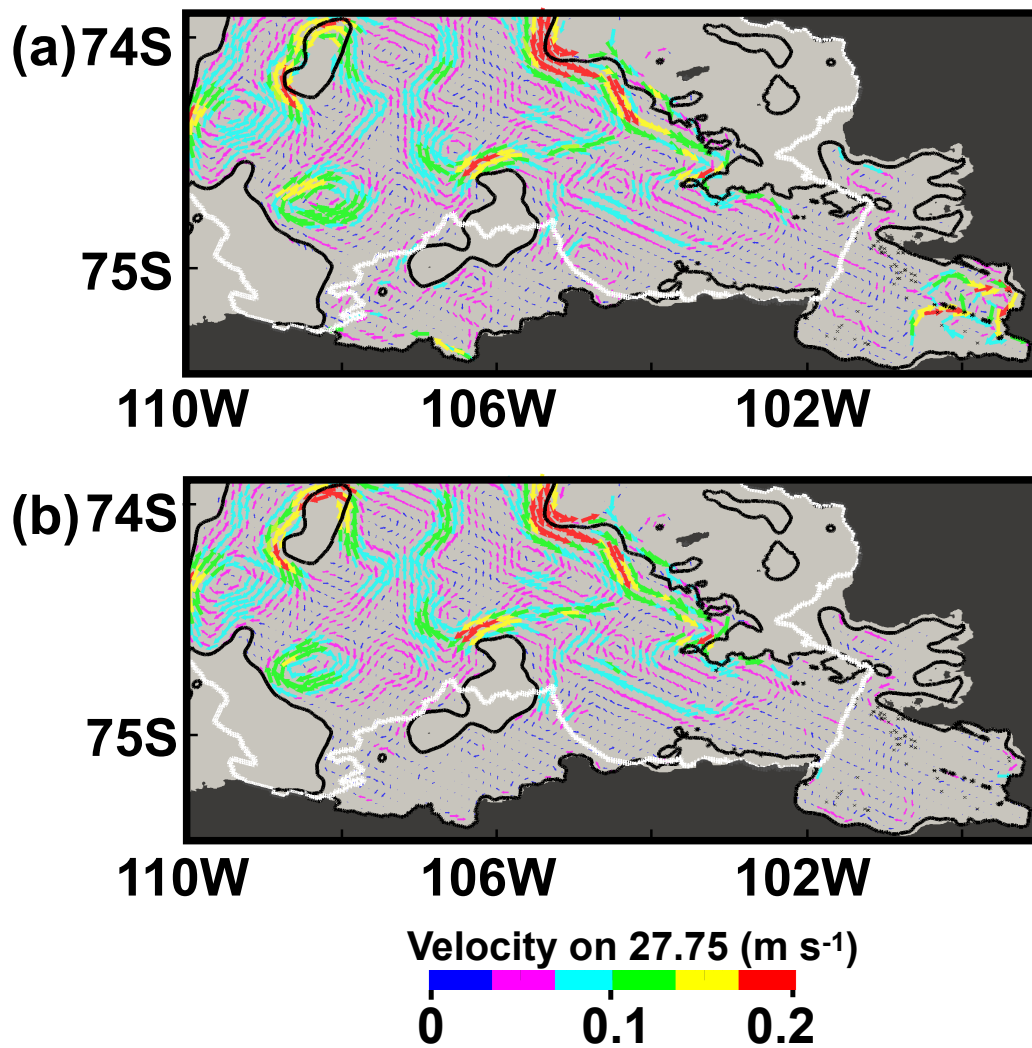

184

185 **Supplementary Figure 18.** Horizontal distributions of 60-day mean ocean current along the

186  $27.75 \text{ kg m}^{-3}$  isopycnal with directions (arrow) and speed (arrow color) for (a) CTRL and (b)

187 NOMELT. Ice shelf fronts are indicated by the white contours.

188

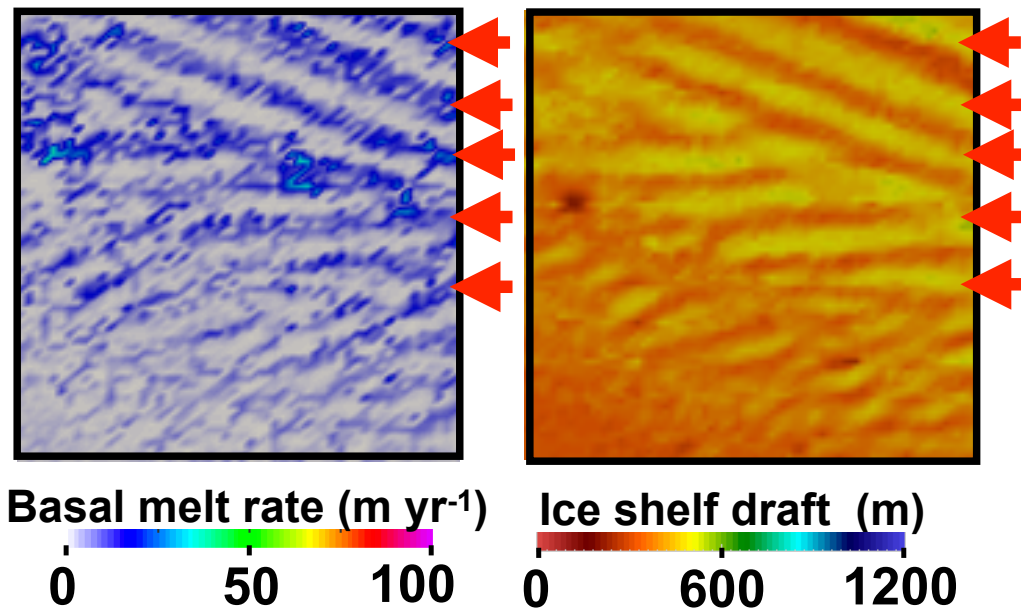

189

190 **Supplementary Figure 19.** Close-ups of the PIIS (a) 60-day mean simulated basal melt rate and

191 (b) ice shelf draft for the location enclosed by the black line in Fig. 3b. Red arrows indicate the

192 locations of keels.

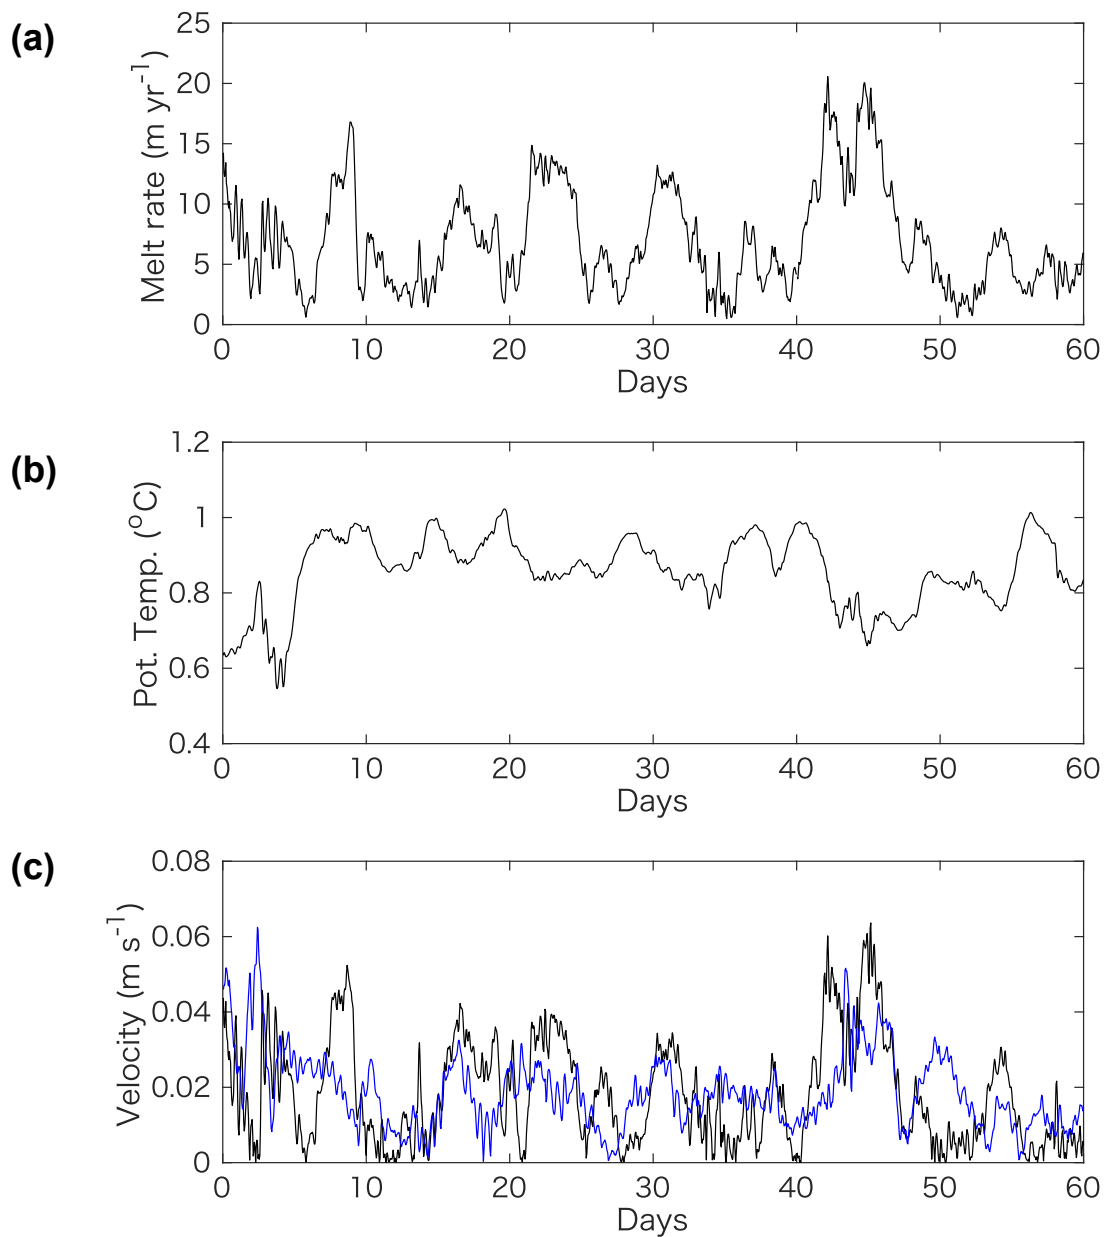

193

194 **Supplementary Figure 20.** (a) Time series of (a) simulated PIIS melt rate at the location of  
 195 ApRES measurements for CTRL. Time series of simulated (b) potential temperature and (c)  
 196 ocean speed below the ice shelf at the same location. Ocean speed 50 m below the uppermost  
 197 model grid (blue) is also shown in (c).



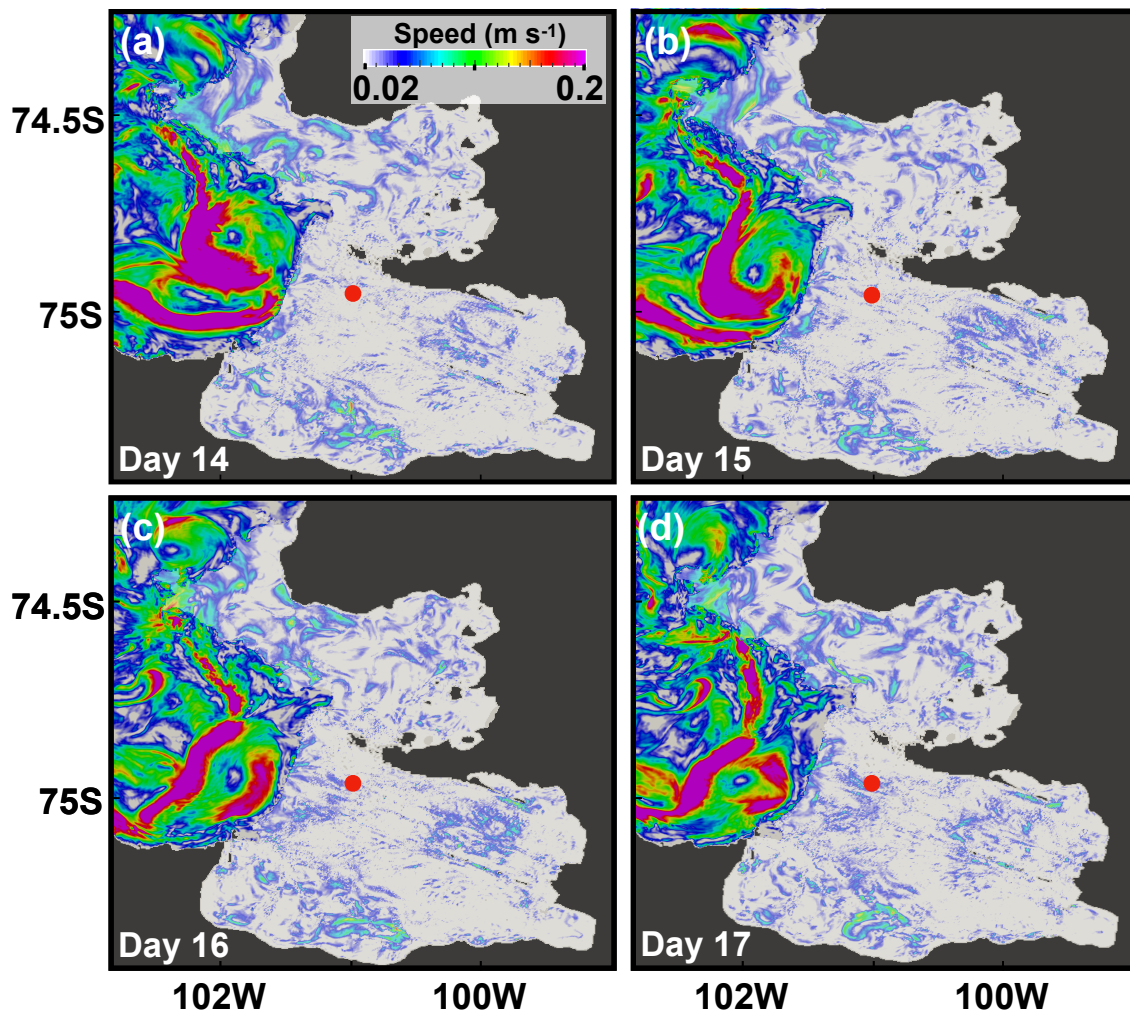

198

199 **Supplementary Figure 21.** Ocean speed anomaly 50 m below ocean top cells (below ice shelf  
 200 for the cavity environment) for days (a) 14, (b) 15, (c) 16, and (d) 17. Ice shelves are shown with  
 201 partially-transparent white patches, similar to Figure 1.

202 **Supplementary Table 1.** Model parameters used for simulations in this study. Only parameters  
 203 that are different from ref. <sup>13</sup> are shown.

| Parameter                                 |         |
|-------------------------------------------|---------|
| Ocean/air drag coefficient scaling factor | 0.25    |
| Air/sea ice drag coefficient              | 0.00125 |
| Ocean/air drag coefficient scaling factor | 0.00285 |
| Lead closing (m)                          | 0.05    |
| Sea ice dry albedo                        | 0.69    |
| Sea ice wet albedo                        | 0.61    |
| Snow dry albedo                           | 0.78    |
| Snow wet albedo                           | 0.63    |

204

205 **Supplementary Table 2.** Description of sensitivity experiments.

| Simulation | Description                                                     |
|------------|-----------------------------------------------------------------|
| CTRL       | Control simulation                                              |
| TIDE       | Tidal forcing is superimposed on lateral ocean boundary forcing |
| NOMELT     | Ice shelf melting is prescribed to be zero                      |

206
